# Supplementary material for: A visible light-driven NaTiO3/g-C3N4 heterojunction photocatalyst for ultra-fast organic dye degradation
Source: Royal Society of Chemistry journal article supplement (doi:10.1039/d3nj02907g), 2023-01-01
Supplement: d3nj02907g1.pdf [file d3nj02907g1.pdf]

## Visible light driven $\text{NaTiO}_3/\text{g-C}_3\text{N}_4$ heterojunction photocatalyst for ultra-fast organic dye degradation

Amritha V K<sup>1</sup>, Sushmee Badhulika<sup>1\*</sup>

<sup>1</sup>Department of Electrical Engineering, Indian Institute of Technology Hyderabad, Hyderabad 502285, India

\*Corresponding author: E-mail: [sbadh@iith.ac.in](mailto:sbadh@iith.ac.in); Phone: 040-23018443 Fax-04023016032

### Supplementary Information

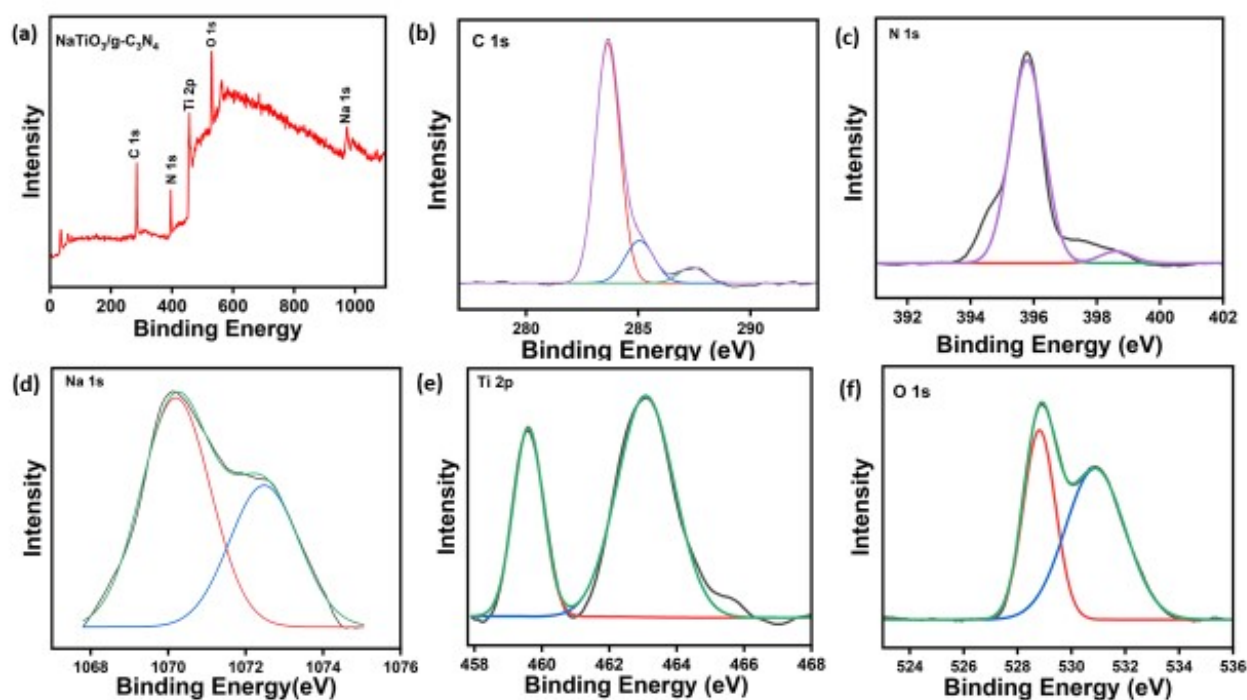

**Fig.S1(a) survey spectrum of  $\text{NaTiO}_3/\text{g-C}_3\text{N}_4$  heterojunction photocatalyst, XPS spectra of (b) C 1s (c) N1s (d) Na 1s, (e) Ti 2p and O 1s state.**

The X-ray photoelectron spectrum serves as a valuable tool for discerning the valence states and chemical environments of constituent elements located at the sample's surface. The

comprehensive XPS survey spectrum in Figure 4(a) unveils the predominant elements situated on the product's surface, encompassing C, N, O, Na, and Ti. Evident photoelectron peaks manifest at specific binding energies: 285 eV (C 1s), 400.1 eV (N 1s), 532.6 eV (O 1s), 455 eV (Ti 2p), and 1072 eV (Na 1s). Delving into the specifics, the photoelectron signal associated with C 1s (Figure 4(b)) unveils two well-defined peaks positioned at 285.13 and 288.27 eV. Meanwhile, the high-resolution N 1s XPS spectra (Figure 4(c)) display an asymmetric profile, indicating the coexistence of diverse nitrogen environments. Employing a three-component fit reveals binding energies of 398.6, 399.8, and 401.5 eV. Among these, the peaks at 399.8 and 401.5 eV correlate with tertiary nitrogen (N (C)<sub>3</sub>) and amino functional groups containing hydrogen (C N H). The 398.6 eV peak commonly corresponds to N atoms sp<sup>2</sup>-bonded to two carbon atoms (C N C), thus confirming the presence of graphite-like sp<sup>2</sup>-bonded graphitic carbon nitride. The XPS peak exhibiting a binding energy of 285.13 eV is attributed to graphitic carbon adsorbed onto the surface of NaTiO<sub>3</sub>. In contrast, the XPS peak at 288.27 eV originates from carbon atoms bonded to three nitrogen atoms within the g-C<sub>3</sub>N<sub>4</sub> lattice [1]. Exploring the Na 1s spectrum, the presence of Na<sup>+</sup> oxidation state is convincingly supported by the presence of two distinct peaks at 1070.1 and 1072.4 eV (Figure 4(d)). The Ti 2p peaks, positioned at 459.6 eV and 463.05 eV, are identified as Ti 2p<sub>3/2</sub> and Ti 2p<sub>1/2</sub>, as shown in Figure 4(e)[2]. In the O 1s XPS spectrum (Figure 7(d)), the peak located at 529 eV is attributed to the oxygen within the NaTiO<sub>3</sub> crystal lattice. Furthermore, the presence of a peak at 532 eV indicates the presence of chemisorbed oxygen species on the sample's surface [3].

## Reference

1. Chai, B., Yan, J., Wang, C., Ren, Z. and Zhu, Y., 2017. Enhanced visible light photocatalytic degradation of Rhodamine B over phosphorus doped graphitic carbon nitride. *Applied Surface Science*, 391, pp.376-383.

- Ernawati, L., Yusariarta, A.W., Laksono, A.D., Wahyuono, R.A., Widiyandari, H., Rebeka, R. and Sitompul, V., 2021. Kinetic studies of methylene blue degradation using CaTiO<sub>3</sub> photocatalyst from chicken eggshells. In *Journal of Physics: Conference Series* (Vol. 1726, No. 1, p. 012017). IOP Publishing.
- Yan, Y., Yang, H., Yi, Z., Li, R. and Xian, T., 2020. Design of ternary CaTiO<sub>3</sub>/g-C<sub>3</sub>N<sub>4</sub>/AgBr Z-scheme heterostructured photocatalysts and their application for dye photodegradation. *Solid State Sciences*, 100, p.106102.

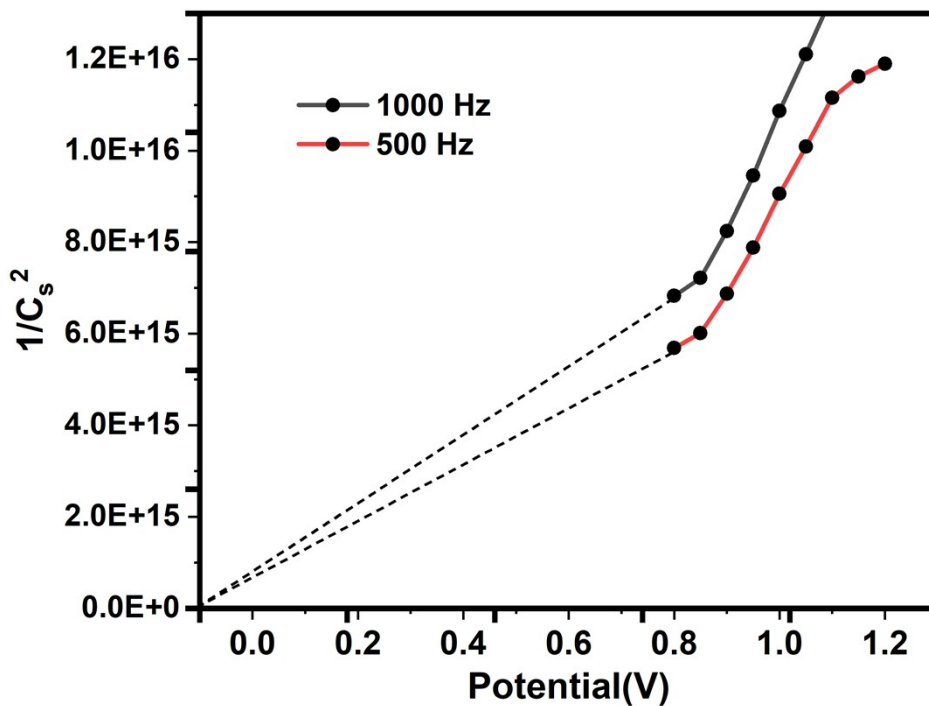

**FigS2. Mott-Schottky plot of NaTiO<sub>3</sub>/g-C<sub>3</sub>N<sub>4</sub> heterojunction with two frequencies (500 and 1000 Hz).**

The Mott-Schottky plot of NaTiO<sub>3</sub>/g-C<sub>3</sub>N<sub>4</sub> heterojunction was plotted with two different frequencies (500 and 1000 Hz). The Fermi level energy obtained from the plot is -0.1 V.

#### Reference

1. Bian, C., Wang, Y., Yi, Y., Shao, S., Sun, P., Xiao, Y., Wang, W. and Dong, X., 2023. Enhanced photocatalytic activity of S-doped graphitic carbon nitride hollow microspheres: Synergistic effect, high-concentration antibiotic elimination and antibacterial behavior. *Journal of Colloid and Interface Science*, 643, pp.256-266.
2. Liu, Y., Bian, C., Li, Y., Sun, P., Xiao, Y., Xiao, X., Wang, W. and Dong, X., 2023. Aminobenzaldehyde covalently modified graphitic carbon nitride photocatalyst through Schiff base reaction: Regulating electronic structure and improving visible-light-driven photocatalytic activity for moxifloxacin degradation. *Journal of Colloid and Interface Science*, 630, pp.867-878.
3. Sun, P., Liu, Y., Mo, F., Wu, M., Xiao, Y., Xiao, X., Wang, W. and Dong, X., 2023. Efficient photocatalytic degradation of high-concentration moxifloxacin over dodecyl benzene sulfonate modified graphitic carbon nitride: Enhanced photogenerated charge separation and pollutant enrichment. *Journal of Cleaner Production*, 393, p.136320.

### **S3. Cost estimation of the as synthesized NaTiO<sub>3</sub>/g-C<sub>3</sub>N<sub>4</sub> heterojunction photocatalyst**

Cost of 40 g NaOH = \$ .32

Cost of 1g TiO<sub>2</sub> = \$ 2.40

Cost of .5g melamine = \$ 2.71

Total cost for the fabrication of heterojunction = \$ 2.7/g
